# Supplementary material
Source: PubMed Central journal article supplement (PMC1322261)
Supplement: bmj_331_7531_1540__1.pdf [file bmj_331_7531_1540__1.pdf]

## SUPPORTING MATERIAL (posted as supplied by the author)

**Table 1** Allusions to Shakespeare. Those asterisked are included in the ‘Various Shakespeare’ line in the figure

|                                                    |     |
|----------------------------------------------------|-----|
| What’s in a name                                   | 559 |
| That next question (but not included in to verb... | 16  |
| to treat or not to treat                           | 244 |
| screen                                             | 96  |
| tell                                               | 53  |
| kill/die                                           | 18  |
| operate                                            | 13  |
| pace                                               | 9   |
| push                                               | 3   |
| clone                                              | 12  |
| assorted others                                    | 23  |
| ’tis nobler                                        | 11  |
| sea troubles                                       | 5   |
| consummations                                      | 2   |
| sleep perchance                                    | 49  |
| mortal coils                                       | 4   |
| calamity long life                                 | 1   |
| proud man’s contumely                              | 1   |
| whips and scorns                                   | 0   |
| law’s delay                                        | 0   |
| insolence of office                                | 0   |
| conscience doth make cowards                       | 0   |
| pith and moment                                    | 0   |
| name of action                                     | 0   |
| undiscovered countries                             | 4   |
| something rotten                                   | 9   |
| solid flesh soliloquy: frailty thy name is woman   | 1   |
| methinks                                           | 4   |
| politic worms                                      | 0   |
| others from Hamlet                                 | 8   |
| much ado *                                         | 171 |
| all’s wells *                                      | 23  |
| quality mercy/pound flesh *                        | 17  |
| glisters/ens *                                     | 16  |
| Love’s labours lost *                              | 17  |
| once more unto the breach *                        | 13  |
| Friends romans countrymen                          | 1   |
| Lend me your ears                                  | 10  |
| Bury Caesar not praise him                         | 3   |
| gild the lily                                      | 5   |
| music be the food of love                          | 4   |
| eye of newt/damned spot                            | 6   |

**Table 2** Proverbs

|                                 |    |
|---------------------------------|----|
| familiarity breeds contempt     | 24 |
| stitch in time                  | 43 |
| look before you leap            | 99 |
| actions speak louder than words | 50 |
| ignorance is bliss              | 37 |
| out of sight out of mind        | 38 |
| ends justify the means          | 40 |

**Information about Lewis Carroll**

Through the looking glass is not easy to trace because ‘through’ is not an admissible search word: 162 identified, plus 11 cabbages and kings. Only 2 not in English.

**Table 3** Biblical allusions

|                                               |    |
|-----------------------------------------------|----|
| Ten commandments                              | 71 |
| Brother’s keeper                              | 56 |
| ‘Let there be...’ \$\$                        | 35 |
| David and Goliath                             | 37 |
| Thou shalt                                    | 26 |
| Out of the mouths of babes                    | 22 |
| Garden of Eden                                | 17 |
| Blind leading the blind                       | 14 |
| Noah’s ark                                    | 14 |
| No room at the inn                            | 11 |
| \$\$ 24 were light; also blight, sight, life. |    |

**Listing of titles for ‘Out of the mouths of babes’:**

Out of the mouths of babes--innocent reporting of harmful labour ward practices.

From the mouths of babes: a response to Should children decide whether they are enrolled in nonbeneficial research? Out of the mouths of babes.

Out of the mouths of babes.

Linguistics. From the mouths (and hands) of babes.

Out of the mouths of babes: oral premalignant lesions and use of alternative tobacco products.

Out of the mouths of babes. Are you spotting communication disorders in children?

Into the mouths of babes. The government subsidy of infant formula.

Into the mouths of babes.

Out of the mouths of babes and sucklings.... ..do we still care for the oral health of our children?

Out of the mouths of babes and sucklings: lessons from early childhood asthma.

Into the mouths of babes.

From the mouths of babes....

From the mouth of babes.

Into the mouths of babes: motivating the child patient.

Out of the mouth of babes.

Out of the mouth of babes.

Editorial: Out of the mouths of babes.

From the mouths of babes ...

(Out of the mouths of babes....).

**Listing of titles for papers having ‘mouth/s’ and ‘baby/ies’ in the title:**

Chemically characterized media for study of foot-and-mouth disease virus in baby hamster kidney cells.

Foot-and-mouth disease virus-induced ribonucleic acid polymerase in baby hamster kidney cells.

Production and purification of milligram amounts of foot-and-mouth disease virus from baby hamster kidney cell cultures.

Penicillin blood levels in babies; procaine penicillin by injection compared with sodium penicillin by mouth.

Virus specific ribonucleic acids in baby hamster kidney cells infected with foot-and-mouth disease virus.

Changes in protein and nucleic acid metabolism in baby hamster kidney cells infected with foot-and-mouth disease virus.

Effect of actinomycin D on virus-induced ribonucleic acid polymerase formation in foot-and-mouth disease virus-infected baby hamster kidney cells.

Foot-and-mouth disease virus-induced alterations of baby hamster kidney cell macromolecular biosynthesis: inhibition of ribonucleic acid methylation and stimulation of ribonucleic acid synthesis.

Translation products of foot-and-mouth disease virus-infected baby hamster kidney cells.

Innocuity testing of foot-and-mouth disease vaccines. II. Aziridine-inactivated antigen produced in baby hamster kidney cells.

Visual assessment of the baby’s wide open mouth.

Assessment of mouth-to-mask ventilation in resuscitation of asphyxic newborn babies. A pilot study.

Sequential modification of translation initiation factor eIF4GI by two different foot-and-mouth disease virus proteases within infected baby hamster kidney cells: identification of the 3Cpro cleavage site.
